# Supplementary material
Source: HighWire-hosted journal article supplement (https://drc.bmj.com/content/6/1/e000588)
Supplement: inline-supplementary-material-1 [file inline-supplementary-material-1.docx]

Supplementary Material

Supplementary Table 1. Pearson correlation coefficient between the total insulin dose at endpoint and baseline characteristics in the insulin aspart and insulin detemir groups

Supplementary Figure 1. Schematic illustration of the study design

Supplementary Figure 2. Changes in flow-mediated dilation of the brachial artery during the 2-week treatment period in the insulin aspart and insulin detemir groups

Supplementary Figure 3. Diurnal variations in low-frequency power at endpoint in the insulin aspart and insulin detemir groups (A). Diurnal variations in high-frequency power at endpoint in the insulin aspart and insulin detemir groups (B). Diurnal variations in low-frequency to high-frequency power ratio at endpoint in the insulin aspart and insulin detemir groups (C). Data are expressed as mean ± SD. *P < 0.05 for comparisons between both groups.
